# Supplementary material for: KIF2C Facilitates Tumor Growth and Metastasis in Pancreatic Ductal Adenocarcinoma
Source: MDPI journal article supplement (doi:10.3390/cancers15051502), 2023-02-27

Supplementary File S1. Full Western blot images

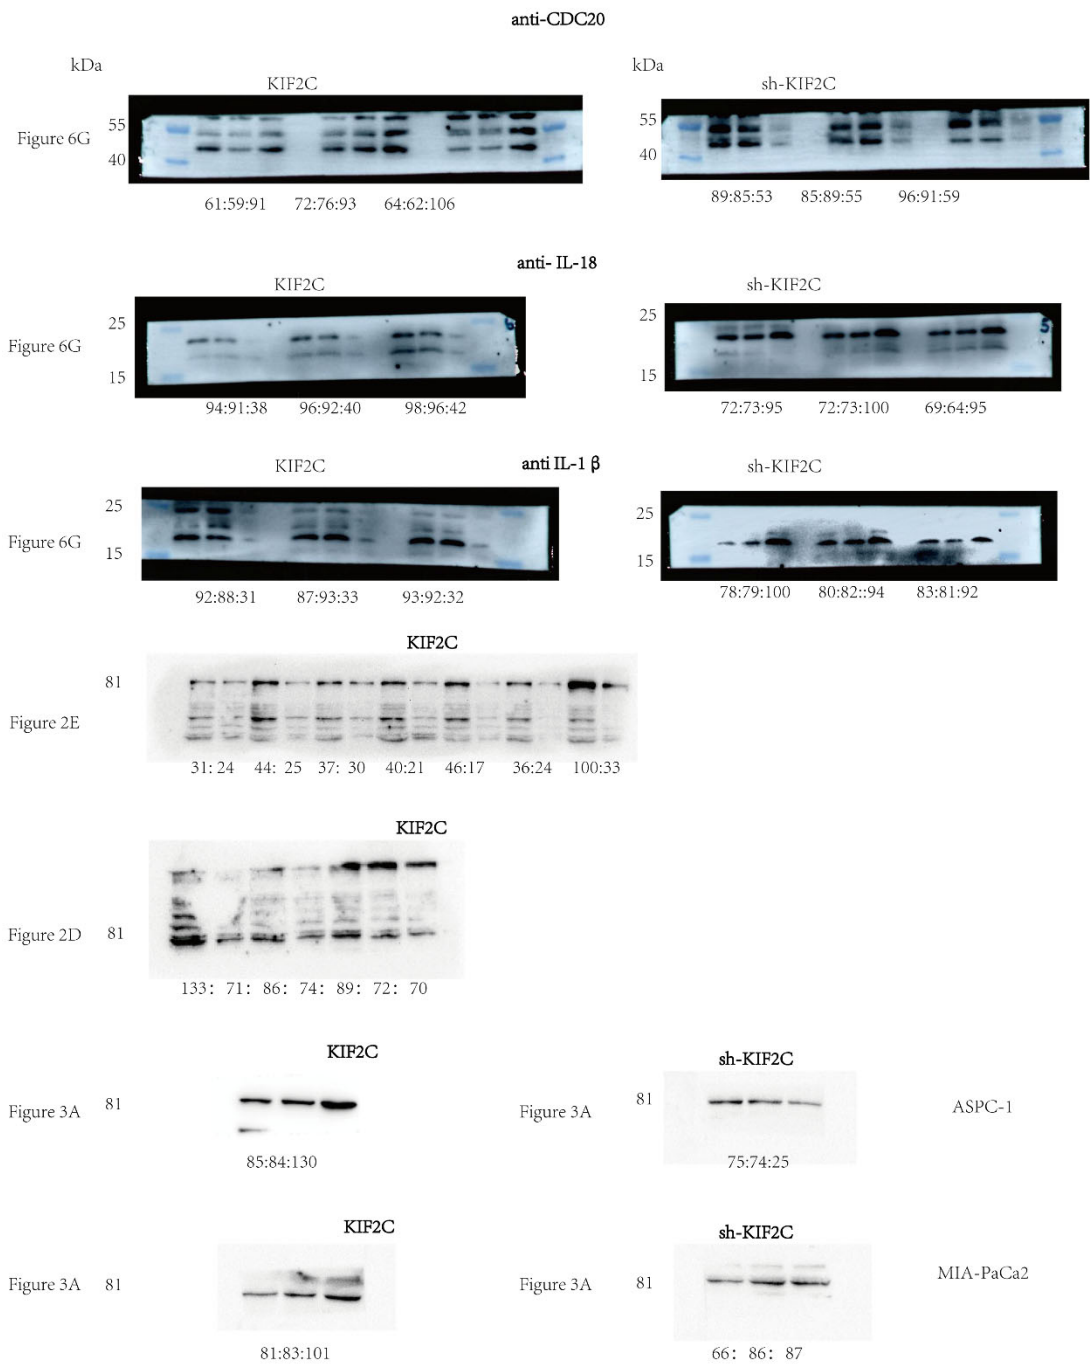

CDC20(55kDa) protein (sh-KIF2C). (This figure is the original image for Fig6G)

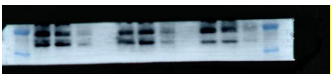

CDC20(55kDa) protein (KIF2C). (This figure is the original image for Fig6G)

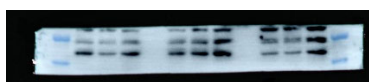

IL-18 (22kDa) protein (KIF2C). (This figure is the original image for Fig6G)

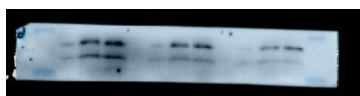

IL-18(22kDa) protein (sh-KIF2C). (This figure is the original image for Fig6G)

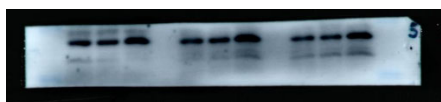

IL-1β(17kDa) protein (KIF2C) (This figure is the original image for Fig6G)

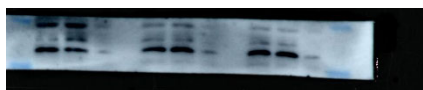

IL-1β(17kDa) protein (sh-KIF2C) (This figure is the original image for Fig6G)

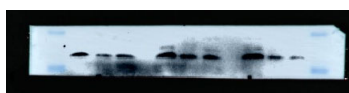

GAPDH (37kDa) (CDC20) (This figure is the original image for Fig6G)

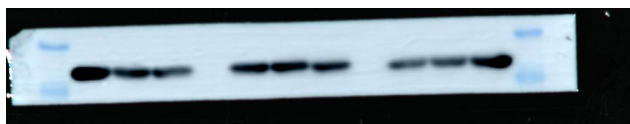

GAPDH(37 kDa) (IL-1β) (This figure is the original image for Fig6G)

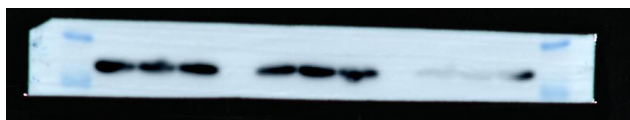

GAPDH (37kDa) (IL-18) (This figure is the original image for Fig6G)

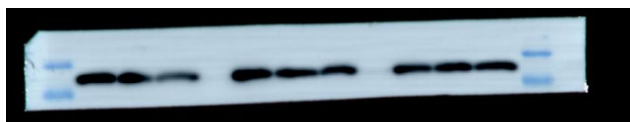

### Transfection WB (KIF2C, 81 kDa)

ASPC-1 (KIF2C) ASPC-1 (sh-KIF2C) (This figure is the original image for Fig3A)

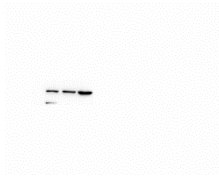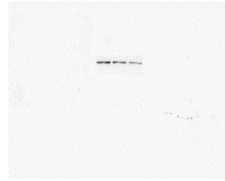

GAPDH

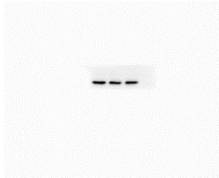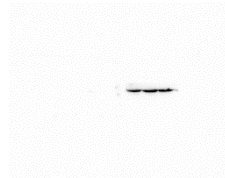

MIA-PaCa2 (KIF2C)

MIA-PaCa2 (sh-KIF2C) (This figure is the original image for Fig3A)

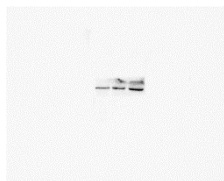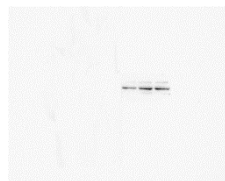

GAPDH

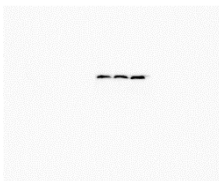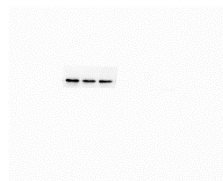

Seven Cell lines WB

GAPDH (This figure is the original image for Fig2D)

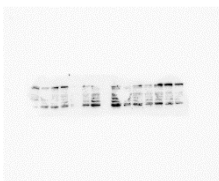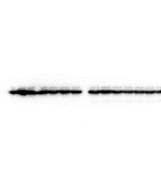

Tissue WB

GAPDH (This figure is the original image for Fig2E)

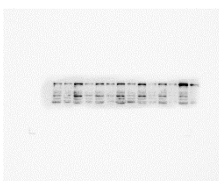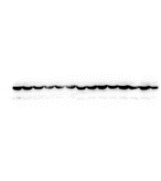

Supplement: s1 [file s1]
