# Supplementary material for: KIF2C Facilitates Tumor Growth and Metastasis in Pancreatic Ductal Adenocarcinoma
Source: Cancers (Basel). 2023 Feb 27;15(5):1502. doi: 10.3390/cancers15051502 (PMC10000478; doi:10.3390/cancers15051502)
Supplement: Supplementary file 1 [file cancers-15-01502-s001.zip › cancers-2241046-Supplementary File S2.xls]

## Sheet: Sheet1
File S2: The primer sequences.
Primer name		Primer sequences
KIF2C	F	5′-GGAGGAGAAGGCTATGGAAGA-3′,
	R	5′-TCGCAGGGCTGAGAAATG-3′
IL-1β	F	5′-TGTGGCAGCTACCTATGTCT-3′
	R	5′-GGGAACATCACACACTAGCA-3′
IL-18	F	5’-TGCATCAACTTTGTGGCAAT-3’
	R	5’-ATAGAGGCCGATTTCCTTGG-3’
CDC20	F	5’-GCACAGTTCGCGTTCGAGA-3’
	R	5’- CTGGATTTGCCAGGAGTTCGG-3’
CCL5	F	5′-AGCCCTCGCTGTCATCCT-3′
	R	5′-CACTTGGCGGTTCTTTCG-3′
CDKN2C	F	5’-ATGGATTTGGAAGGACTGCG-3’
	R	5’-ATGACAGCGAAACCAGTTCG-3’
c-Jun	F	5′-GCCTACAGATGAACTCTTTCTGGC-3′
	R	5′-CCTGAAACATCGCACTATCCTTTG-3
CXCL2	F	5’-TGTGACGGCAGGGAAATGTA-3′
	R	5'-TGCTCTAACACAGAGGGAAACA-3'
MAPK8	F	5’-TTCTGCTGGAATTATTCATCGG-3’
	R	5’-GTCACTACATAAGGCGTCATC-3’
NFKB1	F	5’-GGCAGCACTACTTCTTGACC-3’
	R	5’-CAGCAAACATGGCAGGCTAT-3’
RELA	F	5’-CCTGTCCTTTCTCATCCCA-3’
	R	5’-CTGCCAGAGTTTCGGTTCAC-3’
RIPK2	F	5′- GAATCATGTGGATCCTCTCAGC-3′
	R	5′-TGATTTCCAGGACAGTGATGC-3′
TFDP-1	F	5’-ACGTCTAACGGCACAAGGTT-3’
	R	5’-CTGAGACCCATTGGAGCTTG-3’
GAPDH	F	5′-TGCACCACCAACTGCTTAGC-3′
	R	5′-GGCATGGACTGTGGTCATGAG-3′
